# Supplementary material for: Non-linear stress-softening of the bacterial cell wall confers cell shape homeostasis
Source: PubMed Central journal article supplement — bioRxiv. 2025 Mar 13:2024.09.03.611099. Originally published 2024 Sep 8. Preprint. [Version 2] doi: 10.1101/2024.09.03.611099 (PMC11398337; doi:10.1101/2024.09.03.611099), 2025-03-13
Supplement: NIHPP2024.09.03.611099v1-supplement-1.pdf [file NIHPP2024.09.03.611099v1-supplement-1.pdf]

## Supplementary Figures and Tables

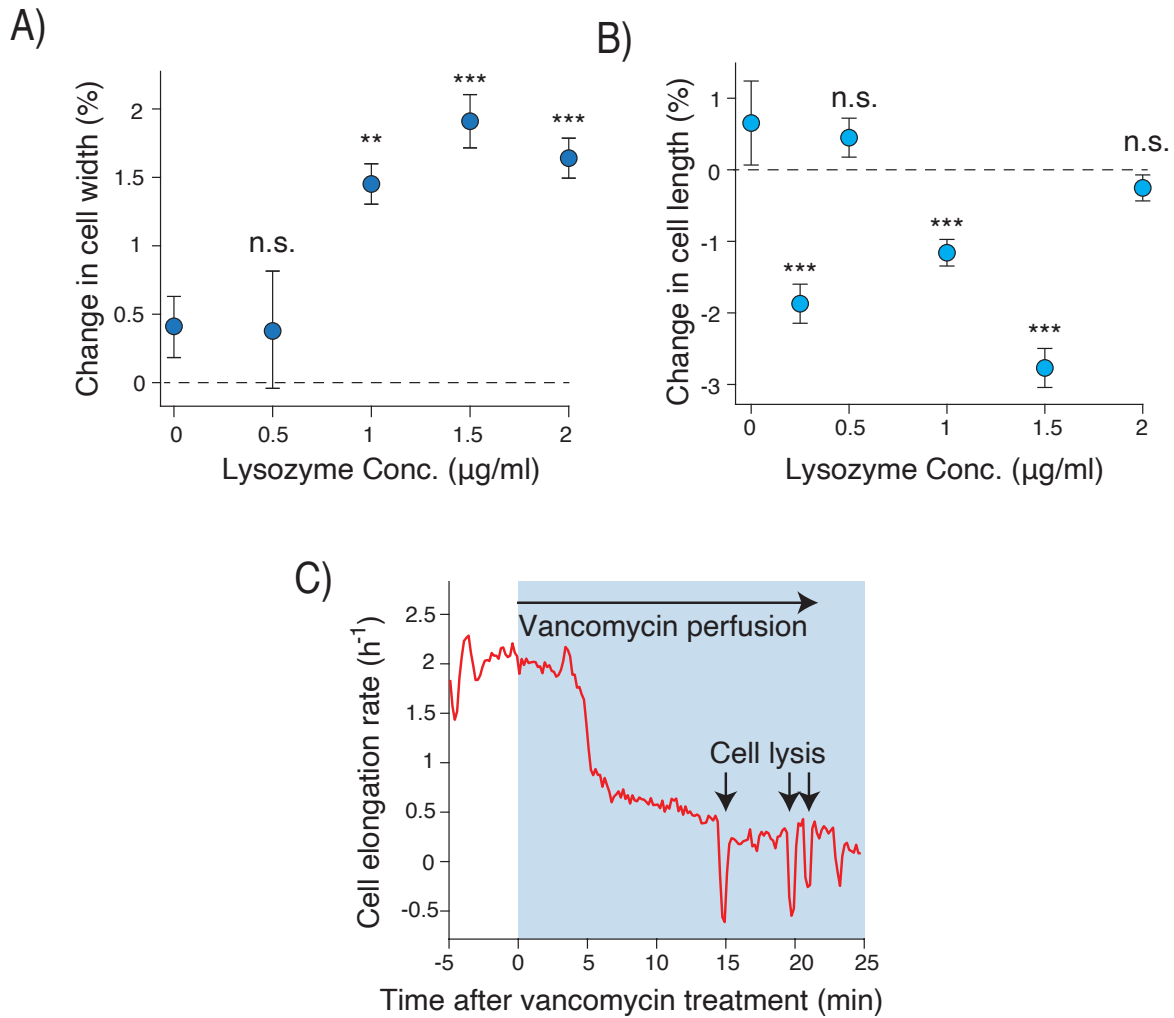

**Figure S1. Lysozyme and vancomycin treatment cause cell widening.** A) Mean change in cell width upon lysozyme treatment. Error bars indicate  $\pm 1$  s.e.m. B) Mean change in cell length upon lysozyme treatment, controlling for cell growth. Error bars indicate  $\pm 1$  s.e.m. C) Population-averaged cellular elongation rate versus time during acute perfusion with 10 µg/mL vancomycin.  $n=18$  cells across 1 experiment.

## $P_{xyI}$ -*mreBCD*

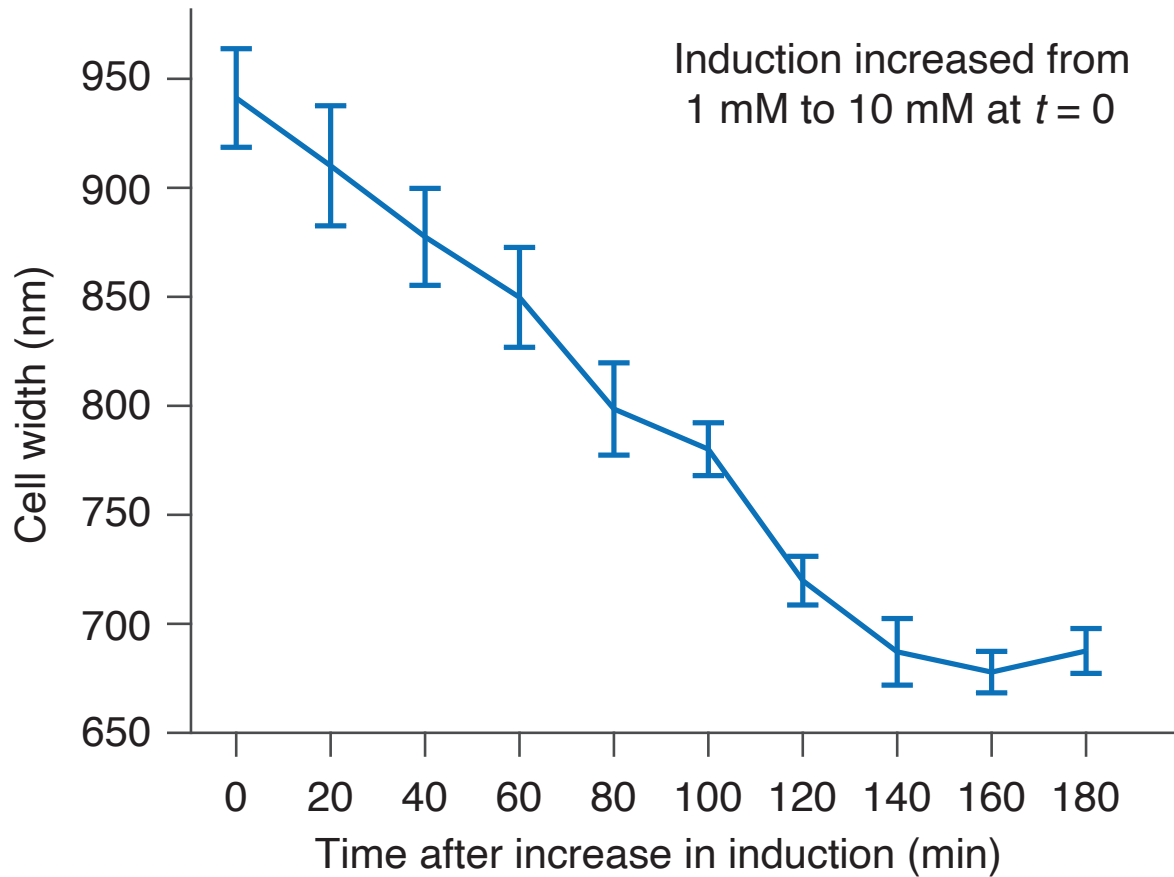

**Figure S2. Acute induction of *mreBCD* causes immediate cell thinning.** Cell width versus time after acute induction of *mreBCD*. Cells were grown to exponential phase in 1 mM xylose and then xylose concentration was increased to 10 mM.  $n=20$  cells across 1 experiment for each time point.

| <b>Strain or Plasmid</b> | <b>Genotype</b>                                                         | <b>Relevant features</b>                                   | <b>Source/Reference</b>   |
|--------------------------|-------------------------------------------------------------------------|------------------------------------------------------------|---------------------------|
| <i>B. subtilis</i> PY79  | wild-type                                                               |                                                            | Lab stock                 |
| bMD545                   | <i>PY79 amyE::erm<br/>Pxyl-mreBCD,<br/>ΔmreBCD::spc<br/>PmreB-minCD</i> | Xylose inducible<br>induction of <i>mreBCD</i><br>operon   | Garner Lab <sup>1</sup>   |
| pPB001                   | pIV::25His                                                              | pIVEX2.3d derivative<br>carrying SPP1<br>endolysin gene 25 | São-José Lab <sup>2</sup> |
| <i>C. glutamicum</i>     | wild-type                                                               |                                                            | Theriot Lab               |
| <i>E. coli</i>           | wild-type MG1655                                                        |                                                            | Lab stock                 |

**Table S1. Strains and plasmids used in this study.**

1. Dion (2019) *Bacillus subtilis* cell diameter is determined by the opposing actions of two distinct cell wall synthetic systems. *Nature Microbiol.* 4(8).
2. Fernandes (2016) More than a hole: the holin lethal function may be required to fully sensitize bacteria to the lytic action of canonical endolysins. *Molecular microbiology.* 102(1).
